# Supplementary material
Source: Springer Nature journal article supplement (https://www.springermedizin.de/resource/supplementary/12985_2010_856_MOESM2_ESM.pdf/9608604)
Supplement: MOESM2 [file 9608604]

|        |                                                               |        |                           |     |
|--------|---------------------------------------------------------------|--------|---------------------------|-----|
| KWT-43 | CCGCAGAGTCTAGACTCGTGGTGGACTTCTCTCAATTTTCTAGGG                 | GGAACC | ACCGTGTGT                 | 300 |
| X65259 | -----                                                         |        | -T-                       |     |
| X75669 | -----                                                         |        | -T-A-                     |     |
| KWT-43 | CTTGGCCAAAATTCGCAGTCCCCAACCTCCAATCACTCACCAACCTCTTGTCTCTCCA    |        |                           | 360 |
| X65259 | -----                                                         |        |                           |     |
| X75669 | -----                                                         |        | -C-                       |     |
| KWT-43 | TGTCTGGTTATCGCTGGACGTGTCTGCGGCGTTTTATCATCTTCTCTTCATCCTGCTG    |        |                           | 420 |
| X65259 | -----                                                         |        | -T-                       |     |
| X75669 | -----                                                         |        | -T-                       |     |
| KWT-43 | CTATGCCTCATCTTCTTGTGGTTCTTCTGGACTATCAAGGTATGTTGCCCGCTTGTCTCT  |        |                           | 480 |
| X65259 | -----                                                         |        |                           |     |
| X75669 | -----                                                         |        | -A-                       |     |
| KWT-43 | CTAATTCAGGATCTTCAACAACCAGCAC                                  | GGGACC | ATGCAGAACCTGCACGACTCCTGCT | 540 |
| X65259 | -----                                                         |        |                           |     |
| X75669 | -----                                                         |        | -A-                       |     |
| KWT-43 | CAAGGAACCTCTATGTATCCCTCCTGTTGCTGTACCAAACCTTCGGACGGAAATTGCACC  |        |                           | 600 |
| X65259 | -----                                                         |        |                           |     |
| X75669 | -----                                                         |        | -C-A-                     |     |
| KWT-43 | TGTATTCCCATCCCATCATCTTGGGCTTTCGGAAAATTCCTATGGGAGTGGGCCTCAGCC  |        |                           | 660 |
| X65259 | -----                                                         |        |                           |     |
| X75669 | -----                                                         |        | -C-                       |     |
| KWT-43 | CGTTTCTCCTGGCTCAGTTTACTAGTGCCATTTGTTTCAGTGGTTCGTAGGGCTTTCCCCC |        |                           | 720 |
| X65259 | -----                                                         |        |                           |     |
| X75669 | -----                                                         |        |                           |     |
